# Supplementary material for: Accurate Quantification of Functional Analogy among Close Homologs
Source: PLoS Comput Biol. 2011 Feb 3;7(2):e1001074. doi: 10.1371/journal.pcbi.1001074 (PMC3033368; doi:10.1371/journal.pcbi.1001074)
Supplement: Table S1 — The results of all evaluations performed, includes networks with added PPI informations and process-specific evaluations. (0.03 MB XLS) [file pcbi.1001074.s004.xls]

## Sheet: Sheet1
Table S1. AUCs and p-values fo evaluations performed using either co-expression only or co-expression combined with PPI information.
			AUC			p-value
Organism Pari	PPI included?	Standard	Sequence	NetCompare	Combined rank	Sequence	NetCompare	Combined rank
CEL_DME	+ppi	cell_cycle	0.596538	0.731923	0.734231	0.0423487	0.000240638	0.000213942
CEL_DME	+ppi	go_BP	0.595336	0.582349	0.621611	1.36737e-05	0.000123029	6.63224e-08
CEL_DME	+ppi	neuronal	0.550809	0.581539	0.592533	0.0120113	0.000377885	7.95058e-05
CEL_MMU	+ppi	cell_cycle	0.569949	0.623728	0.621911	0.0553168	0.00762428	0.00825576
CEL_MMU	+ppi	go_BP	0.541674	0.565168	0.571648	0.00178367	6.46246e-06	9.33814e-07
CEL_MMU	+ppi	neuronal	0.555532	0.582141	0.597073	0.00307613	5.3315e-05	3.02318e-06
CEL_SCE	+ppi	cell_cycle	0.695106	0.701389	0.768849	0.000777106	0.000568253	1.15342e-05
CEL_SCE	+ppi	go_BP	0.615132	0.581459	0.641507	0.0019152	0.0147984	0.000261758
DME_MMU	+ppi	cell_cycle	0.67338	0.644213	0.679167	0.00148804	0.00553843	0.00112005
DME_MMU	+ppi	go_BP	0.571758	0.538682	0.574488	1.87238e-08	0.000934049	5.88835e-09
DME_MMU	+ppi	neuronal	0.542076	0.575908	0.590776	0.0463256	0.00421588	0.00106668
DME_SCE	+ppi	cell_cycle	0.732456	0.565789	0.677193	0.00163777	0.110402	0.00955526
DME_SCE	+ppi	go_BP	0.630208	0.630361	0.675424	4.15478e-05	4.08172e-05	9.78276e-08
MMU_SCE	+ppi	cell_cycle	0.671715	0.515645	0.620025	0.000276079	0.191159	0.00563502
MMU_SCE	+ppi	go_BP	0.576421	0.557289	0.577022	0.00145549	0.00967792	0.00136177
MMU_SCE	+ppi	mito	0.544232	0.567067	0.571853	0.0567262	0.0167299	0.0124126
CEL_DME	+ppi	cell_cycle	0.596538	0.710385	0.716923	0.0423487	0.000686867	0.00050422
CEL_DME	+ppi	go_BP	0.594421	0.57766	0.617837	1.52284e-05	0.000243817	1.40725e-07
CEL_DME	+ppi	neuronal	0.551195	0.569853	0.587266	0.0115448	0.00163004	0.000169372
CEL_MMU	+ppi	cell_cycle	0.569949	0.627362	0.619731	0.0553168	0.00648492	0.00907214
CEL_MMU	+ppi	go_BP	0.541674	0.566432	0.572268	0.00178367	4.4894e-06	7.69229e-07
CEL_MMU	+ppi	neuronal	0.555532	0.582141	0.597073	0.00307613	5.3315e-05	3.02318e-06
CEL_SCE	+ppi	cell_cycle	0.695106	0.698413	0.767857	0.000777106	0.000659765	1.23025e-05
CEL_SCE	+ppi	go_BP	0.615132	0.608792	0.658134	0.0019152	0.00293531	6.2397e-05
DME_MMU	+ppi	cell_cycle	0.67338	0.643287	0.682639	0.00148804	0.00575603	0.000941001
DME_MMU	+ppi	go_BP	0.572271	0.516071	0.561207	1.42808e-08	0.0568638	1.07335e-06
DME_MMU	+ppi	neuronal	0.542076	0.585577	0.598896	0.0463256	0.0017647	0.000462435
DME_SCE	+ppi	cell_cycle	0.732456	0.664912	0.716667	0.00163777	0.0134377	0.00281788
DME_SCE	+ppi	go_BP	0.633708	0.649175	0.691179	2.52809e-05	3.60073e-06	6.7834e-09
MMU_SCE	+ppi	cell_cycle	0.671715	0.499625	0.605632	0.000276079	0.250948	0.011164
MMU_SCE	+ppi	go_BP	0.573211	0.553745	0.572975	0.00200159	0.0128919	0.00205296
MMU_SCE	+ppi	mito	0.544232	0.582113	0.581894	0.0567262	0.00621993	0.00631696
CEL_DME	+ppi	cell_death	0.5	0.4375	0.25	0.25	0.299353	0.420672
CEL_DME	+ppi	cell_fate_commitment	0.518699	0.614634	0.587263	0.190544	0.016699	0.0406486
CEL_DME	+ppi	cell_migration	0.425862	0.44569	0.418103	0.404582	0.369596	0.416536
CEL_DME	+ppi	cell_morphogenesis	0.588426	0.588889	0.627315	0.0360304	0.0355084	0.00886693
CEL_DME	+ppi	cell_surface_receptor_linked_signal_transduction	0.599405	0.552976	0.616667	0.0493989	0.123076	0.0326225
CEL_DME	+ppi	cytoskeleton_organization_and_biogenesis	0.593823	0.667055	0.676573	0.0273117	0.0010872	0.000644215
CEL_DME	+ppi	gastrulation	0.228571	0.485714	0.242857	0.465254	0.25	0.459426
CEL_DME	+ppi	morphogenesis_of_an_epithelium	0.583128	0.535391	0.592593	0.0594373	0.153217	0.0471781
CEL_DME	+ppi	vesicle-mediated_transport	0.739583	0.40625	0.619792	0.0189956	0.378137	0.0937368
CEL_MMU	+ppi	cell_death	0.666667	0.666667	0.75	0.119875	0.119875	0.0722111
CEL_MMU	+ppi	cell_fate_commitment	0.500455	0.442998	0.469547	0.247955	0.45013	0.376736
CEL_MMU	+ppi	cell_migration	0.51853	0.5544	0.560973	0.165637	0.0500348	0.037753
CEL_MMU	+ppi	cell_morphogenesis	0.559145	0.585157	0.603448	0.0511524	0.0169467	0.00662647
CEL_MMU	+ppi	cell_surface_receptor_linked_signal_transduction	0.537656	0.556082	0.570529	0.0881858	0.0415907	0.0204426
CEL_MMU	+ppi	cytoskeleton_organization_and_biogenesis	0.540021	0.627859	0.616944	0.147726	0.021481	0.029063
CEL_MMU	+ppi	gastrulation	0.685714	0.904762	0.852381	0.0395839	0.000605367	0.002042
CEL_MMU	+ppi	morphogenesis_of_an_epithelium	0.5445	0.697	0.6495	0.13712	0.0019748	0.0109537
CEL_MMU	+ppi	regulation_of_signal_transduction	0.5	0.25	0.3125	0.25	0.420672	0.386686
CEL_MMU	+ppi	vesicle-mediated_transport	0.581448	0.432127	0.5181	0.109603	0.364093	0.212624
CEL_RNA	+ppi	polymerase_II_promoter	0.532086	0.647059	0.612299	0.189887	0.0468367	0.0778373
CEL_SCE	+ppi	cell_morphogenesis	0.395299	0.737179	0.604701	0.411219	0.00904915	0.0887814
CEL_SCE	+ppi	cell_surface_receptor_linked_signal_transduction	0.618182	0.209091	0.409091	0.106258	0.480667	0.347981
CEL_SCE	+ppi	cytoskeleton_organization_and_biogenesis	0.769324	0.727053	0.851449	0.000849743	0.00338337	3.30485e-05
CEL_SCE	+ppi	vesicle-mediated_transport	0.82	0.82	1	0.0174886	0.0174886	0.0013945
DME_MMU	+ppi	cell_death	0.574851	0.557204	0.581159	0.0275777	0.0555441	0.0208528
DME_MMU	+ppi	cell_fate_commitment	0.477885	0.511283	0.482108	0.37954	0.179926	0.357667
DME_MMU	+ppi	cell_migration	0.610022	0.549286	0.602861	0.000194505	0.0330358	0.000419792
DME_MMU	+ppi	cell_morphogenesis	0.616896	0.529413	0.606052	1.89636e-05	0.0798501	8.26543e-05
DME_MMU	+ppi	cell_surface_receptor_linked_signal_transduction	0.615551	0.539657	0.602809	4.60301e-05	0.0497994	0.000219076
DME_MMU	+ppi	cytoskeleton_organization_and_biogenesis	0.485714	0.662271	0.570696	0.290745	0.0040592	0.0734066
DME_MMU	+ppi	gastrulation	0.487631	0.583179	0.538343	0.291988	0.0384514	0.127725
DME_MMU	+ppi	morphogenesis_of_an_epithelium	0.731915	0.587234	0.719574	0.000310296	0.0557719	0.000557559
DME_MMU	+ppi	regulation_of_signal_transduction	0.575758	0.454545	0.505793	0.0767102	0.365051	0.234429
DME_MMU	+ppi	vesicle-mediated_transport	0.673141	0.536903	0.660377	0.00166104	0.140731	0.00298351
DME_RNA	+ppi	polymerase_II_promoter	0.509058	0.758333	0.669203	0.223581	3.78926e-05	0.0032719
DME_SCE	+ppi	cell_morphogenesis	0.65102	0.706803	0.768707	0.014786	0.00246257	0.000201212
DME_SCE	+ppi	cell_surface_receptor_linked_signal_transduction	0.840278	0.625	0.826389	0.00138396	0.0770449	0.00194859
DME_SCE	+ppi	cytoskeleton_organization_and_biogenesis	0.583333	0.668333	0.646667	0.101164	0.0230776	0.0356167
DME_SCE	+ppi	vesicle-mediated_transport	0.683824	0.530637	0.609069	0.0117942	0.185202	0.0597395
MMU_RNA	+ppi	polymerase_II_promoter	0.60418	0.601473	0.673056	0.00933344	0.010639	0.000136461
MMU_SCE	+ppi	cell_morphogenesis	0.459524	0.510476	0.481905	0.351915	0.222444	0.297297
MMU_SCE	+ppi	cell_surface_receptor_linked_signal_transduction	0.69697	0.30303	0.464646	0.0320918	0.462853	0.295105
MMU_SCE	+ppi	cytoskeleton_organization_and_biogenesis	0.432692	0.625	0.5	0.347107	0.086405	0.25
MMU_SCE	+ppi	vesicle-mediated_transport	0.885417	0.734776	0.869391	7.52549e-07	0.001111	1.9019e-06
RNA_SCE	+ppi	polymerase_II_promoter	0.509058	0.758333	0.669203	0.223581	3.78926e-05	0.0032719
CEL_DME	-ppi	cell_death	0.5	0.4375	0.25	0.25	0.299353	0.420672
CEL_DME	-ppi	cell_fate_commitment	0.518699	0.631978	0.595393	0.190544	0.00872042	0.0317466
CEL_DME	-ppi	cell_migration	0.425862	0.472414	0.437931	0.404582	0.313802	0.38402
CEL_DME	-ppi	cell_morphogenesis	0.588426	0.565278	0.602315	0.0360304	0.0702301	0.0227555
CEL_DME	-ppi	cell_surface_receptor_linked_signal_transduction	0.599405	0.595833	0.641667	0.0493989	0.053546	0.0165817
CEL_DME	-ppi	cytoskeleton_organization_and_biogenesis	0.593823	0.641414	0.660839	0.0273117	0.00394476	0.00151011
CEL_DME	-ppi	gastrulation	0.228571	0.242857	0.157143	0.465254	0.459426	0.48533
CEL_DME	-ppi	morphogenesis_of_an_epithelium	0.600155	0.625388	0.664984	0.0376243	0.0179648	0.00446592
CEL_DME	-ppi	vesicle-mediated_transport	0.739583	0.4375	0.651042	0.0189956	0.339143	0.0658171
CEL_MMU	-ppi	cell_death	0.666667	0.666667	0.75	0.119875	0.119875	0.0722111
CEL_MMU	-ppi	cell_fate_commitment	0.500455	0.442998	0.469547	0.247955	0.45013	0.376736
CEL_MMU	-ppi	cell_migration	0.51853	0.555124	0.559731	0.165637	0.0485529	0.0398784
CEL_MMU	-ppi	cell_morphogenesis	0.559145	0.584933	0.601949	0.0511524	0.0171289	0.00719361
CEL_MMU	-ppi	cell_surface_receptor_linked_signal_transduction	0.537656	0.556082	0.570813	0.0881858	0.0415907	0.020137
CEL_MMU	-ppi	cytoskeleton_organization_and_biogenesis	0.540021	0.611746	0.610707	0.147726	0.0333458	0.0342582
CEL_MMU	-ppi	gastrulation	0.685714	0.904762	0.852381	0.0395839	0.000605367	0.002042
CEL_MMU	-ppi	morphogenesis_of_an_epithelium	0.5445	0.697	0.652	0.13712	0.0019748	0.0101016
CEL_MMU	-ppi	regulation_of_signal_transduction	0.5	0.25	0.3125	0.25	0.420672	0.386686
CEL_MMU	-ppi	vesicle-mediated_transport	0.581448	0.457014	0.533937	0.109603	0.323451	0.184391
CEL_RNA	-ppi	polymerase_II_promoter	0.532086	0.676471	0.657754	0.189887	0.0286728	0.0394401
CEL_SCE	-ppi	cell_morphogenesis	0.395299	0.773504	0.662393	0.411219	0.00392814	0.0378775
CEL_SCE	-ppi	cell_surface_receptor_linked_signal_transduction	0.618182	0.209091	0.409091	0.106258	0.480667	0.347981
CEL_SCE	-ppi	cytoskeleton_organization_and_biogenesis	0.769324	0.816425	0.879227	0.000849743	0.00014467	9.29077e-06
CEL_SCE	-ppi	vesicle-mediated_transport	0.82	0.82	1	0.0174886	0.0174886	0.0013945
DME_MMU	-ppi	cell_death	0.574851	0.543052	0.575959	0.0275777	0.0894972	0.0262858
DME_MMU	-ppi	cell_fate_commitment	0.477885	0.466038	0.447534	0.37954	0.42998	0.476204
DME_MMU	-ppi	cell_migration	0.606637	0.528831	0.591047	0.00030942	0.0956269	0.00145462
DME_MMU	-ppi	cell_morphogenesis	0.614383	0.519013	0.600192	3.008e-05	0.13067	0.000189028
DME_MMU	-ppi	cell_surface_receptor_linked_signal_transduction	0.615551	0.490852	0.574466	4.60301e-05	0.308099	0.00398466
DME_MMU	-ppi	cytoskeleton_organization_and_biogenesis	0.485714	0.642491	0.559341	0.290745	0.00868822	0.0943923
DME_MMU	-ppi	gastrulation	0.487631	0.587508	0.539116	0.291988	0.0333748	0.125604
DME_MMU	-ppi	morphogenesis_of_an_epithelium	0.731915	0.354043	0.559574	0.000310296	0.489224	0.101081
DME_MMU	-ppi	regulation_of_signal_transduction	0.575758	0.472371	0.519608	0.0767102	0.322654	0.197852
DME_MMU	-ppi	vesicle-mediated_transport	0.673141	0.531909	0.657325	0.00166104	0.154232	0.00341346
DME_RNA	-ppi	polymerase_II_promoter	0.509058	0.840217	0.723188	0.223581	1.51481e-07	0.000265957
DME_SCE	-ppi	cell_morphogenesis	0.65102	0.694558	0.754422	0.014786	0.00378808	0.000376647
DME_SCE	-ppi	cell_surface_receptor_linked_signal_transduction	0.858824	0.641176	0.829412	0.000543509	0.05695	0.00122283
DME_SCE	-ppi	cytoskeleton_organization_and_biogenesis	0.583333	0.616667	0.615	0.101164	0.0608363	0.062536
DME_SCE	-ppi	vesicle-mediated_transport	0.683824	0.530637	0.613971	0.0117942	0.185202	0.0546256
MMU_RNA	-ppi	polymerase_II_promoter	0.544023	0.624368	0.609425	0.0962275	0.00352547	0.00769829
MMU_SCE	-ppi	cell_morphogenesis	0.459524	0.47619	0.451905	0.351915	0.311804	0.368845
MMU_SCE	-ppi	cell_surface_receptor_linked_signal_transduction	0.69697	0.434343	0.565657	0.0320918	0.337933	0.148647
MMU_SCE	-ppi	cytoskeleton_organization_and_biogenesis	0.432692	0.625	0.5	0.347107	0.086405	0.25
MMU_SCE	-ppi	vesicle-mediated_transport	0.885417	0.722756	0.866987	7.52549e-07	0.00173789	2.17886e-06
RNA_SCE	-ppi	polymerase_II_promoter	0.509058	0.840217	0.723188	0.223581	1.51481e-07	0.000265957
